# Supplementary material for: Isoforskolin Alleviates AECOPD by Improving Pulmonary Function and Attenuating Inflammation Which Involves Downregulation of Th17/IL-17A and NF-κB/NLRP3
Source: PubMed Central journal article supplement (PMC8361481; doi:10.3389/fphar.2021.721273), 2021-07-30
Supplement: DataSheet1.pdf [file DataSheet1.pdf]

## Supplementary Figures

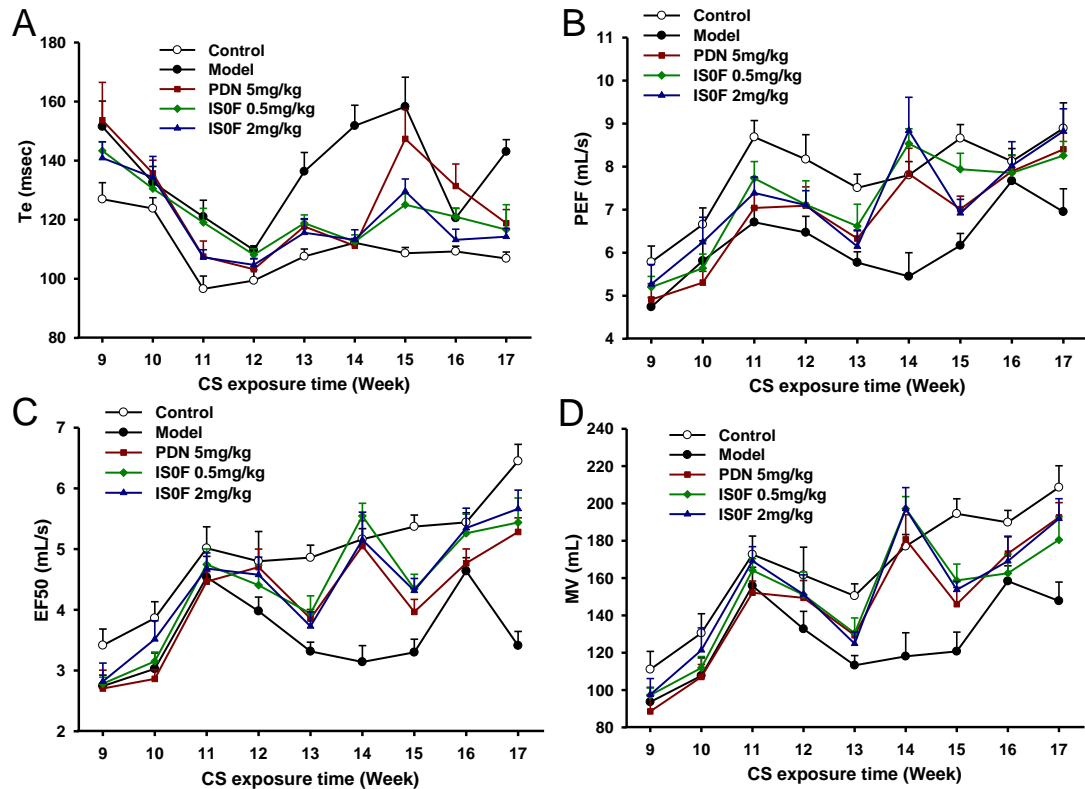

**FIGURE 1** Pulmonary function in conscious mice from 9~17 weeks in each group. **(A)** Expiratory time (Te), **(B)** Peak expiratory flow (PEF), **(C)** Expiratory flow at 50 % tidal volume (EF50), and **(D)** Maximum minute ventilation (MV) in each group. Data are expressed as means  $\pm$  SEM (n = 12 in each group).

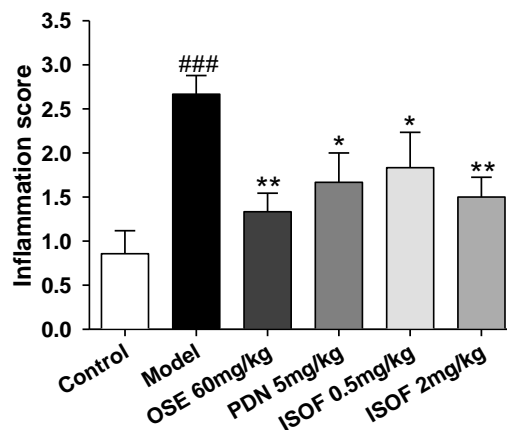

**FIGURE 2** Inflammation score of lung tissue by H&E staining in each group. Data are expressed as means  $\pm$  SEM (n = 6 in each group). ###P < 0.001 versus control group; \*P < 0.05, \*\*P < 0.01 versus model group.

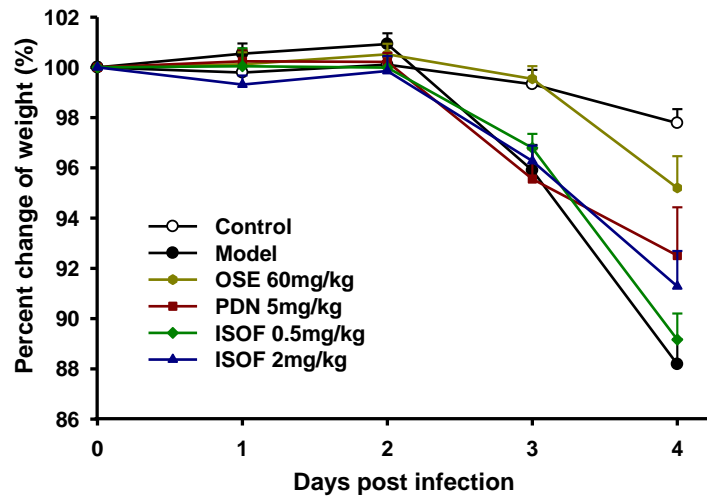

**FIGURE 3** Body weight changes in each group after H1N1 virus infection. Data are expressed as means  $\pm$  SEM (n = 12 in each group).
